# Supplementary material for: Prototropic tautomerism of 3,5-(oxo/thioxo) derivatives of 2,7-dimethyl-1,2,4-triazepinesElectronic supplementary information (ESI) available: the B3LYP/6-31G* optimized geometries of all the structures included in Fig. 1 and the corresponding TS. See http://www.rsc.org/suppdata/nj/b1/b109397e/
Source: Royal Society of Chemistry journal article supplement (doi:10.1039/b109397e), 2002-05-27
Supplement: b109397e.doc [file b109397e.doc]

**Supplementary Information**

Geometries for all the structures (minima and transition states) considered in this study.

Atomic numbers are given in the first column, next columns refer to x,y,z coordinates in Å

3O5O Structure I

6 -1.246415 -0.596851 -0.711059

7 -1.242147 -0.594538 0.571563

7 0.007017 -0.593193 1.221134

6 0.946167 0.422554 1.091201

7 0.997601 1.128183 -0.126826

6 0.726498 0.729084 -1.431591

6 0.014704 -0.607706 -1.540811

6 -2.575559 -0.568942 -1.409159

6 -0.087566 -1.183782 2.560080

8 1.708858 0.726204 1.995335

8 1.036021 1.421402 -2.380435

1 1.598502 1.943778 -0.060957

1 -0.185744 -0.797836 -2.595506

1 0.681013 -1.388737 -1.146010

1 -2.668944 0.335818 -2.023612

1 -3.387877 -0.589711 -0.679870

1 -2.672130 -1.426808 -2.086781

1 -0.573439 -0.499112 3.264397

1 0.916932 -1.406572 2.917419

1 -0.671613 -2.100979 2.478667

3O5O Structure IIa

6 -0.964382 1.167567 0.136663

7 0.215435 1.432255 -0.299933

7 1.263081 0.570973 -0.053275

6 1.273569 -0.838360 -0.020244

7 0.128314 -1.532418 -0.416526

6 -1.024696 -1.239541 0.030008

6 -1.279453 -0.071374 0.956018

6 -2.075012 2.119576 -0.206340

6 2.573696 1.227394 -0.077773

8 2.318707 -1.414911 0.233949

8 -2.080132 -1.946103 -0.432355

1 -2.300710 -0.042706 1.349319

1 -0.584127 -0.131891 1.804194

1 -2.834888 1.631464 -0.832073

1 -1.676303 2.976863 -0.752485

1 -2.583080 2.473353 0.700559

1 3.272410 0.643089 -0.679399

1 2.983257 1.316744 0.933845

1 2.427616 2.220696 -0.503332

1 -2.882922 -1.686741 0.044767

3O5O Structure IIb

6 -0.992672 1.170933 0.115119

7 0.190190 1.437874 -0.309024

7 1.244318 0.587909 -0.016009

6 1.284307 -0.817019 -0.035751

7 0.132006 -1.533277 -0.385418

6 -1.017997 -1.231349 0.076241

6 -1.311836 -0.052203 0.956748

6 -2.107309 2.104446 -0.261251

6 2.548547 1.259331 -0.030136

8 2.349930 -1.381827 0.153738

8 -2.101992 -1.941473 -0.281928

1 -2.347573 -0.057013 1.299411

1 -0.639406 -0.075519 1.825292

1 -2.863861 1.585879 -0.865030

1 -1.715300 2.947049 -0.834515

1 -2.617446 2.481561 0.634874

1 3.224181 0.765535 -0.732818

1 3.006606 1.227602 0.963034

1 2.372523 2.294090 -0.323781

1 -1.787070 -2.635163 -0.893599

3O5O Structure IIIa

6 -1.258922 -0.542717 -0.735560

7 -1.256422 -0.537462 0.551232

7 -0.024524 -0.549925 1.215537

6 1.010769 0.282877 0.896078

7 1.237273 1.006026 -0.157151

6 0.662188 0.798851 -1.393360

6 -0.015565 -0.572683 -1.579153

6 -2.593177 -0.450011 -1.418396

6 -0.145576 -1.075629 2.582641

8 1.902292 0.373422 1.912382

8 0.681561 1.620957 -2.290164

1 -0.247439 -0.721477 -2.634251

1 0.649538 -1.371495 -1.226101

1 -2.631194 0.455787 -2.037125

1 -3.401508 -0.418686 -0.685182

1 -2.740897 -1.303924 -2.091285

1 -0.407117 -0.283863 3.292947

1 0.797217 -1.531784 2.883910

1 -0.934628 -1.826414 2.566578

1 2.592617 0.972212 1.571949

3O5O Structure IIIb

6 -1.133873 1.045314 0.118165

7 0.019770 1.420375 -0.313733

7 1.138243 0.656009 0.064150

6 1.205495 -0.718553 -0.076240

7 0.258125 -1.576788 -0.237680

6 -1.067488 -1.361171 0.064446

6 -1.347662 -0.158327 0.989024

6 -2.329388 1.819112 -0.355883

6 2.354050 1.473842 0.077116

8 2.459413 -1.239807 -0.044756

8 -1.978258 -2.044926 -0.364092

1 -2.370435 -0.213511 1.362926

1 -0.638317 -0.144299 1.825758

1 -3.000969 1.151887 -0.911339

1 -2.026502 2.645197 -1.002335

1 -2.898022 2.208625 0.497549

1 2.891264 1.447137 -0.882569

1 3.014720 1.158529 0.890549

1 2.047103 2.502254 0.260665

1 3.132157 -0.576423 -0.259349

3O5O Structure IVa

6 -1.338990 -.528484 -.745307

7 -1.329351 -.510089 .545568

7 -.082474 -.500974 1.227566

6 .841695 .518472 1.133935

7 .975844 1.131119 -.134272

6 .820255 .471792 -1.340898

6 -.205878 -.358159 -1.639836

6 -2.698272 -.703046 -1.380714

6 -.240399 -1.082167 2.561503

8 1.549825 .890039 2.054763

8 1.808307 .824947 -2.202842

1 1.731018 1.807260 -.121727

1 -.263054 -.787597 -2.636121

1 -2.980350 .184036 -1.961001

1 -3.452192 -.883180 -.611932

1 -2.686161 -1.553286 -2.075353

1 -.856038 -.444085 3.206874

1 .743946 -1.204638 3.011876

1 -.725488 -2.053163 2.448484

1 1.604660 .463927 -3.080609

3O5O Structure IVb

6 -1.334006 -0.500336 -0.783965

7 -1.352570 -0.480738 0.506613

7 -0.117050 -0.500218 1.215698

6 0.800385 0.529393 1.151267

7 0.999336 1.089414 -0.127581

6 0.871400 0.411996 -1.336713

6 -0.167525 -0.387299 -1.647572

6 -2.681572 -0.631025 -1.452491

6 -0.320458 -1.070178 2.548453

8 1.447800 0.942109 2.099662

8 1.841842 0.675564 -2.256138

1 1.617713 1.890474 -0.098447

1 -0.175132 -0.858844 -2.623611

1 -2.911941 0.259346 -2.050046

1 -3.462732 -0.773595 -0.703129

1 -2.681563 -1.487955 -2.138596

1 -0.947252 -0.421522 3.171898

1 0.649089 -1.200701 3.028432

1 -0.811538 -2.037226 2.427810

1 2.688867 0.814136 -1.799493

3O5O Structure Va

6 -1.379668 0.379917 -0.790700

7 -1.405402 0.361164 0.500766

6 -0.223646 0.355530 -1.662895

6 -2.739854 0.356630 -1.449842

7 -0.131181 0.526533 1.176089

6 0.814344 -0.438145 0.986761

6 -0.370177 1.029262 2.527923

7 1.279056 -0.888988 -0.141677

8 1.360226 -0.922760 2.120059

6 0.927290 -0.293854 -1.333741

8 1.870314 -0.463572 -2.292042

1 -0.351860 0.652999 -2.698082

1 -2.833750 1.207230 -2.136875

1 -3.529666 0.415927 -0.698482

1 -2.871109 -0.555078 -2.044320

1 0.583551 1.263839 3.002728

1 -0.920486 0.308203 3.144621

1 -0.963770 1.940480 2.433626

1 2.082988 -1.509609 1.831535

3O5O Structure Vb

6 -1.390709 0.362140 -0.746529

7 -1.387226 0.341772 0.543719

6 -0.246492 0.369011 -1.638864

6 -2.761470 0.313487 -1.381605

7 -0.101794 0.519420 1.189108

6 0.832989 -0.459967 0.963782

6 -0.319398 0.976594 2.561115

7 1.292796 -0.874044 -0.174306

8 1.361046 -0.998400 2.080697

6 0.932227 -0.254126 -1.341863

8 1.919708 -0.393024 -2.264085

1 -0.421375 0.694026 -2.662534

1 -2.883140 1.155803 -2.074915

1 -3.537649 0.368214 -0.615903

1 -2.891937 -0.606522 -1.963790

1 0.642347 1.206149 3.022288

1 -0.848869 0.231807 3.167881

1 -0.922375 1.885204 2.508554

1 2.076475 -1.583868 1.769722

1 1.631187 0.027710 -3.090069

3O5O Structure Vc

6 -1.367187 0.371953 -0.756930

7 -1.361069 0.354439 0.537284

6 -0.216954 0.385105 -1.634479

6 -2.736847 0.328147 -1.393748

7 -0.052375 0.533358 1.144216

6 0.800856 -0.557128 0.949078

6 -0.230001 1.043086 2.497830

7 1.277606 -0.919057 -0.186818

8 1.214635 -1.261242 2.024487

6 0.971403 -0.217725 -1.320486

8 1.996304 -0.281330 -2.207697

1 -0.378289 0.718773 -2.657914

1 -2.851764 1.165709 -2.093677

1 -3.514125 0.394564 -0.629867

1 -2.874094 -0.595450 -1.968370

1 0.748670 1.234001 2.947619

1 -0.824983 0.374716 3.144833

1 -0.770587 1.988997 2.429638

1 0.658398 -1.049117 2.790753

1 1.742518 0.206576 -3.007698

3O5O Structure Vd

6 -1.355818 0.401023 -0.801301

7 -1.381524 0.376930 0.493096

6 -0.192046 0.379980 -1.657710

6 -2.713295 0.389036 -1.465508

7 -0.084719 0.539336 1.135819

6 0.784887 -0.529182 0.976929

6 -0.286730 1.094554 2.467356

7 1.254298 -0.940526 -0.151922

8 1.250241 -1.162676 2.075405

6 0.957755 -0.270222 -1.315734

8 1.935210 -0.387685 -2.245472

1 -0.302290 0.695789 -2.689793

1 -2.796428 1.238128 -2.155619

1 -3.505765 0.458775 -0.717666

1 -2.852382 -0.523284 -2.057064

1 0.682025 1.311460 2.926962

1 -0.886904 0.442930 3.125736

1 -0.834039 2.032227 2.355648

1 0.697753 -0.942648 2.842296

1 2.629516 -0.931813 -1.833110

3O5O Structure TS I-IIb

6 1.099911 -1.144444 0.030313

7 -0.111579 -1.442731 -0.258646

7 -1.164512 -0.638494 0.208068

6 -1.333235 0.724253 -0.129277

7 -0.180529 1.492408 -0.287900

6 1.042380 1.281262 0.171328

6 1.490745 0.054549 0.882179

6 2.192936 -2.028175 -0.499776

6 -2.416317 -1.405563 0.246782

8 -2.445949 1.202039 -0.256982

8 1.748578 2.307430 -0.126246

1 0.551013 2.599198 -0.588996

1 2.561241 0.093926 1.087086

1 2.856265 -1.466877 -1.170746

1 1.763917 -2.869223 -1.047814

1 2.814885 -2.408601 0.320985

1 -2.843661 -1.529089 -0.754746

1 -3.132970 -0.874629 0.872094

1 -2.193370 -2.383097 0.675482

1 0.939466 -0.006939 1.832529

3O5O Structure TS I-IIIa

6 1.110868 1.185927 0.000022

7 -0.130607 1.500175 -0.000115

7 -1.218349 0.664081 -0.000004

6 -1.357131 -0.710207 0.000005

7 -0.248912 -1.568842 -0.000062

6 1.130162 -1.479011 -0.000009

6 1.830508 -0.139699 0.000251

6 2.057078 2.366911 -0.000086

6 -2.493615 1.399536 0.000032

8 -2.470172 -1.219408 0.000047

8 1.789886 -2.504192 -0.000103

1 2.507841 -0.165647 0.865567

1 2.711561 2.345823 0.881768

1 1.491372 3.300002 -0.000088

1 2.711439 2.345757 -0.882029

1 -3.081871 1.148265 0.886284

1 -3.082258 1.147662 -0.885783

1 -2.240245 2.457759 -0.000369

1 2.508363 -0.165631 -0.864650

1 -0.566053 -2.533838 -0.000274

3O5O Structure TS I-IVa

6 -1.146163 1.123848 -0.005743

7 0.069097 1.463293 -0.274601

7 1.157181 0.653159 0.155433

6 1.411211 -0.662091 -0.125123

7 0.293271 -1.523362 -0.342850

6 -0.953573 -1.372556 0.117821

6 -1.613618 -0.163509 0.528438

6 -2.195928 2.153952 -0.337992

6 2.347455 1.487883 0.348381

8 2.525878 -1.155363 -0.186916

8 -1.809799 -2.338572 0.071092

1 0.560032 -2.430560 -0.711983

1 -1.962233 -0.167422 1.563603

1 -2.850664 1.795821 -1.140978

1 -1.731941 3.096307 -0.637116

1 -2.834876 2.326687 0.537909

1 2.783358 1.783319 -0.612817

1 3.086439 0.927802 0.919764

1 2.041198 2.380088 0.895381

1 -2.553098 -1.317347 0.192270

3O5O Structure TS IIIa-Vb

6 1.271997 -0.997557 0.044721

7 0.112852 -1.460854 -0.314750

7 -1.072831 -0.745123 0.027753

6 -1.311261 0.567147 -0.051238

7 -0.492691 1.596419 -0.236031

6 0.795329 1.472281 0.060063

6 1.600308 0.331071 0.533230

6 2.415378 -1.959229 -0.172471

6 -2.190306 -1.690982 0.152359

8 -2.617545 0.887183 0.013150

8 1.635229 2.430436 -0.160520

1 1.967194 0.410312 1.558383

1 3.019628 -2.019643 0.741586

1 3.077105 -1.593984 -0.965749

1 2.048466 -2.955237 -0.430436

1 -1.798273 -2.586109 0.634392

1 -2.580224 -1.957098 -0.835893

1 -2.985056 -1.254413 0.754742

1 -2.633210 1.861485 -0.038634

1 2.422911 1.484256 0.021780

3O5O Structure TS IVa-IVb

6 1.183666 -1.115586 -0.034608

7 -0.038050 -1.503515 -0.187311

7 -1.093505 -0.672057 0.288146

6 -1.366767 0.568279 -0.250398

7 -0.237708 1.357129 -0.557719

6 0.978235 1.320537 0.117042

6 1.636138 0.185826 0.429347

6 2.236325 -2.143317 -0.411180

6 -2.266373 -1.490026 0.599177

8 -2.486367 1.016575 -0.435490

8 1.538502 2.535725 0.374291

1 -0.492765 2.218941 -1.023786

1 2.587226 0.273469 0.941548

1 3.244187 -1.726997 -0.335089

1 2.081655 -2.486782 -1.438597

1 2.167704 -3.021090 0.240834

1 -2.687680 -1.947687 -0.303828

1 -3.021695 -0.860087 1.068332

1 -1.954214 -2.276545 1.288442

1 0.836010 3.183199 0.553642

3O5O Structure TS IVb-Va

6 1.152747 -1.143568 -0.003006

7 -0.050069 -1.579984 -0.225586

7 -1.163099 -0.744282 0.100337

6 -1.265284 0.549609 -0.164912

7 -0.272483 1.453665 -0.443051

6 0.990712 1.332361 0.077041

6 1.629854 0.165652 0.385395

6 2.222173 -2.186615 -0.244867

6 -2.358440 -1.534279 0.379555

8 -2.355932 1.239915 -0.159278

8 1.647332 2.501360 0.235708

1 -1.425329 2.125627 -0.339571

1 2.659196 0.249043 0.714434

1 2.892276 -1.874915 -1.054730

1 1.768653 -3.146505 -0.498183

1 2.836540 -2.305747 0.656378

1 -2.622068 -2.132778 -0.498393

1 -3.177393 -0.861984 0.633869

1 -2.144891 -2.206081 1.214729

1 1.050804 3.218383 -0.037108

3O5O Structure TS Vb-Va

6 -1.096107 -1.192676 -0.050425

7 0.150203 -1.515460 -0.104419

6 -1.660235 0.092413 0.343159

6 -2.062862 -2.257306 -0.512941

7 1.087087 -0.551369 0.442082

6 1.156495 0.641267 -0.251811

6 2.340839 -1.240550 0.749758

7 0.198477 1.487830 -0.444495

8 2.385181 0.957216 -0.708325

6 -1.041857 1.278134 0.110924

8 -1.734321 2.453514 0.325154

1 -2.702008 0.117974 0.647201

1 -2.804487 -2.455628 0.271509

1 -1.529923 -3.181886 -0.743012

1 -2.613658 -1.926198 -1.401312

1 3.028042 -0.540004 1.227323

1 2.813717 -1.666466 -0.143545

1 2.105918 -2.047428 1.446786

1 2.297680 1.851412 -1.087556

1 -1.670169 2.687678 1.263805

5S3O Structure I

6 .636155 1.475010 .039865

7 -.607536 1.625736 .311944

7 -1.512409 .705290 -.249337

6 -1.479810 -.658870 -.008241

7 -.230398 -1.271543 .254432

6 1.041963 -.954466 -.134473

6 1.149800 .367681 -.855595

6 1.619603 2.424042 .658241

6 -2.854974 1.280456 -.384303

8 -2.485644 -1.350153 .005609

16 2.326850 -1.945571 .184662

1 -.354908 -2.206978 .630287

1 2.183984 .535084 -1.151716

1 .512845 .333508 -1.752743

1 2.331171 1.877169 1.289984

1 1.101163 3.169809 1.264134

1 2.205832 2.929376 -.119763

1 -3.374602 1.308124 .579882

1 -3.430758 .671399 -1.080188

1 -2.743208 2.293364 -.771569

5S3O Structure IIa

6 -.103317 1.556904 .158376

7 1.052145 1.319261 -.354097

7 1.696361 .124629 -.105198

6 1.160655 -1.166510 .028883

7 -.194182 -1.365099 -.281542

6 -1.116367 -.626361 .193459

6 -.819881 .574902 1.066417

6 -.776994 2.852439 -.193872

6 3.154809 .215736 -.223255

8 1.898496 -2.104485 .280853

16 -2.780426 -.976167 -.342973

1 -1.707724 1.019400 1.519396

1 -.138016 .256971 1.867846

1 -1.709791 2.671196 -.744659

1 -.117750 3.460962 -.816197

1 -1.040782 3.414340 .711662

1 3.535892 -.646244 -.773443

1 3.625784 .229317 .765436

1 3.377776 1.145390 -.747784

1 -3.400233 -.090983 .464297

5S3O Structure IIb

6 -0.088712 1.566145 0.146489

7 1.067449 1.313581 -0.355888

7 1.696708 0.110592 -0.093399

6 1.148504 -1.175056 0.017858

7 -0.211499 -1.360726 -0.292846

6 -1.120144 -0.608701 0.187614

6 -0.825645 0.595862 1.051371

6 -0.744602 2.868647 -0.212276

6 3.157504 0.187418 -0.191721

8 1.875546 -2.125419 0.256025

16 -2.832779 -0.857153 -0.224449

1 -1.725763 1.045231 1.476845

1 -0.163554 0.285865 1.872049

1 -1.683050 2.695461 -0.755542

1 -0.079409 3.464744 -0.840284

1 -0.997185 3.438520 0.691449

1 3.536870 -0.662156 -0.762461

1 3.616038 0.166363 0.802571

1 3.397115 1.129346 -0.685930

1 -2.610990 -1.895597 -1.056782

5S3O Structure IIIa

6 -0.281817 1.549233 0.145424

7 0.911071 1.412094 -0.317780

7 1.636128 0.268985 0.028670

6 1.121255 -0.992432 -0.008422

7 -0.109325 -1.410881 -0.105311

6 -1.211941 -0.686309 0.208033

6 -0.947304 0.554780 1.061301

6 -1.072216 2.734929 -0.322185

6 3.086302 0.471582 -0.103020

8 2.092609 -1.932323 -0.013463

16 -2.744099 -1.085518 -0.289198

1 -1.876060 0.951286 1.468919

1 -0.262273 0.301174 1.882376

1 -1.974369 2.388248 -0.843025

1 -0.479946 3.355784 -0.997150

1 -1.406707 3.335381 0.532790

1 3.432027 0.219699 -1.111149

1 3.609874 -0.150214 0.623070

1 3.278556 1.524590 0.097637

1 1.612808 -2.781153 -0.044439

5S3O Structure IIIb

6 -0.361413 1.511342 0.195471

7 0.817836 1.424120 -0.315340

7 1.613185 0.311999 -0.013612

6 1.156043 -0.989341 0.026182

7 -0.054699 -1.431705 -0.061889

6 -1.182180 -0.741611 0.210742

6 -0.969583 0.482036 1.108690

6 -1.209821 2.669278 -0.239419

6 3.033840 0.593514 -0.254673

8 2.109985 -1.948378 0.096805

16 -2.686369 -1.132493 -0.373116

1 -1.910903 0.831863 1.530007

1 -0.268942 0.237049 1.918023

1 -2.109628 2.287021 -0.739420

1 -0.662424 3.319367 -0.924695

1 -1.546300 3.247867 0.629613

1 3.413461 0.061852 -1.136139

1 3.639980 0.347515 0.626350

1 3.112703 1.664314 -0.433394

1 2.998505 -1.572158 0.178999

5S3O Structure IVa

6 0.484802 1.673020 -0.039059

7 1.558428 0.964788 -0.129574

7 1.536929 -0.382338 0.316553

6 0.754454 -1.355486 -0.277978

7 -0.543221 -0.958388 -0.669324

6 -1.314606 -0.001582 -0.014939

6 -0.843285 1.208760 0.350975

6 0.626645 3.132052 -0.401365

6 2.888968 -0.809504 0.682178

8 1.110068 -2.507926 -0.453374

16 -2.992125 -0.562704 0.265220

1 -1.034660 -1.732436 -1.100064

1 -1.498849 1.910253 0.856233

1 0.025725 3.379783 -1.284920

1 1.673216 3.369175 -0.602486

1 0.267568 3.764310 0.421190

1 3.543381 -0.870297 -0.195521

1 2.832175 -1.789072 1.155774

1 3.292724 -0.077715 1.383712

1 -3.554652 0.660680 0.327093

5S3O Structure IVb

6 0.474629 1.673770 -0.034162

7 1.552514 0.973393 -0.124342

7 1.539875 -0.374900 0.321368

6 0.766388 -1.350702 -0.284708

7 -0.536128 -0.965868 -0.662614

6 -1.311349 -0.017706 0.001755

6 -0.847841 1.195102 0.365662

6 0.598861 3.132003 -0.403600

6 2.896666 -0.793636 0.680169

8 1.136972 -2.496967 -0.473203

16 -3.039745 -0.424665 0.232970

1 -1.024456 -1.732349 -1.107847

1 -1.509673 1.879871 0.884752

1 -0.015606 3.370050 -1.280398

1 1.640682 3.377637 -0.618765

1 0.243308 3.763906 0.420598

1 3.547550 -0.850151 -0.200342

1 2.848462 -1.773778 1.153638

1 3.298660 -0.059721 1.380452

1 -2.846736 -1.666446 0.734434

5S3O Structure Va

6 -0.419391 1.690596 -0.058561

7 -1.524767 1.028043 -0.087951

6 0.903922 1.189890 0.287450

6 -0.518885 3.135176 -0.489687

7 -1.479498 -0.321781 0.435511

6 -0.698683 -1.206588 -0.269686

6 -2.833184 -0.732261 0.808999

7 0.568591 -1.109041 -0.527037

8 -1.337929 -2.320463 -0.677427

6 1.310377 -0.077635 0.011547

16 3.030193 -0.495147 0.288507

1 1.642787 1.922245 0.600355

1 -0.117684 3.787802 0.296250

1 -1.559545 3.404231 -0.680459

1 0.073890 3.316402 -1.394051

1 -2.793632 -1.714460 1.282466

1 -3.509988 -0.766849 -0.053363

1 -3.208185 -0.000064 1.526669

1 -0.647602 -2.891142 -1.062509

1 2.925080 -1.747721 -0.196088

5S3O Structure Vb

6 -.408835 1.691342 -.056868

7 -1.518260 1.036336 -.083704

6 .914172 1.185771 .291339

6 -.499748 3.135771 -.491084

7 -1.483959 -.313401 .437194

6 -.705823 -1.202299 -.268398

6 -2.841407 -.716636 .805229

7 .559218 -1.106920 -.527198

8 -1.349330 -2.313492 -.674687

6 1.311702 -.084231 .011927

16 2.992060 -.653692 .225318

1 1.650052 1.920260 .604292

1 -.091414 3.788501 .291219

1 -1.539345 3.411133 -.678593

1 .090067 3.310494 -1.398746

1 -2.808653 -1.699889 1.276899

1 -3.515446 -.746229 -.059503

1 -3.214960 .016204 1.523036

1 -.659389 -2.888946 -1.054290

1 3.491418 .485060 .751181

5S3O Structure Vc

6 -.403850 1.682789 -.067343

7 -1.510487 1.015529 -.047109

6 .923829 1.182608 .252457

6 -.520290 3.121694 -.512178

7 -1.407346 -.326159 .495250

6 -.691807 -1.198388 -.334037

6 -2.719763 -.742919 .974087

7 .563234 -1.096418 -.585070

8 -1.330657 -2.259462 -.870828

6 1.311965 -.098585 -.003910

16 2.980785 -.682956 .248826

1 1.668273 1.919437 .539456

1 -.081557 3.784701 .244399

1 -1.568335 3.391225 -.657187

1 .027810 3.289676 -1.446717

1 -2.642639 -1.733284 1.431714

1 -3.494593 -.742815 .187658

1 -3.037538 -.032231 1.739273

1 -2.290601 -2.135929 -.801680

1 3.453567 .428355 .852539

5S3O Structure Vd

6 -0.424561 1.682976 -0.068669

7 -1.522221 1.000303 -0.048815

6 0.909621 1.198379 0.242374

6 -0.562097 3.121805 -0.507123

7 -1.400513 -0.341856 0.490497

6 -0.674968 -1.205267 -0.336244

6 -2.705679 -0.774764 0.974530

7 0.579547 -1.087988 -0.590980

8 -1.298468 -2.279322 -0.867217

6 1.312616 -0.078080 -0.009610

16 3.013034 -0.521490 0.329392

1 1.652481 1.938375 0.526516

1 -0.132716 3.786873 0.252885

1 -1.613810 3.377120 -0.651318

1 -0.015544 3.302000 -1.440261

1 -2.614881 -1.763815 1.432538

1 -3.483213 -0.784613 0.190866

1 -3.029291 -0.067413 1.740328

1 -2.260115 -2.167485 -0.800961

1 2.949015 -1.706133 -0.309592

5S3O Structure TS I-IIb

6 1.707983 -0.804994 0.004836

7 0.638195 -1.441839 -0.295728

7 -0.613847 -1.012459 0.186588

6 -1.173881 0.232460 -0.074184

7 -0.308696 1.292659 -0.254519

6 0.925486 1.470870 0.192785

6 1.736261 0.435033 0.885094

6 3.006473 -1.310066 -0.555858

6 -1.514818 -2.164061 0.327506

16 -2.822572 0.480162 -0.171047

8 1.270095 2.669093 -0.099057

1 0.036686 2.581246 -0.542668

1 2.748712 0.792288 1.077021

1 1.247969 0.196781 1.841493

1 3.467395 -0.553087 -1.203498

1 2.839824 -2.220155 -1.134904

1 3.719243 -1.517669 0.252625

1 -2.058080 -2.357884 -0.603231

1 -2.238099 -1.957411 1.116158

1 -0.897842 -3.023425 0.590755

5S3O Structure TS I-IIIa

6 .059932 1.618070 .068876

7 1.253439 1.280756 -.267629

7 1.721989 .010461 .107844

6 1.002814 -1.110713 -.067123

7 -.333670 -1.271129 -.265399

6 -1.347332 -.465825 .139701

6 -.876810 .772689 .902788

6 -.433887 2.950024 -.417708

6 3.185309 -.067804 .129407

8 1.504331 -2.297732 -.144215

16 -2.946191 -.801673 -.118313

1 .242826 -2.498297 -.331474

1 -1.741311 1.354895 1.218496

1 -.333664 .433055 1.797699

1 -1.326000 2.811386 -1.041708

1 .337003 3.460006 -.998471

1 -.731563 3.580328 .429558

1 3.586386 .117502 -.871894

1 3.475479 -1.061190 .468405

1 3.562788 .691667 .816760

5S3O Structure TS I-IVa

6 0.116867 1.660882 -0.015654

7 1.302480 1.208184 -0.238003

7 1.663010 -0.097339 0.189150

6 1.060363 -1.277064 -0.147664

7 -0.352572 -1.270106 -0.382010

6 -1.281001 -0.437285 0.113144

6 -1.058184 0.924170 0.472351

6 -0.098164 3.115725 -0.354044

6 3.111268 -0.171907 0.405211

8 1.633302 -2.349962 -0.237636

16 -2.979453 -0.798847 0.078644

1 -0.661726 -2.162967 -0.751996

1 -2.549485 0.808366 0.066603

1 -1.491360 1.267863 1.410818

1 -0.800688 3.222902 -1.188929

1 0.850187 3.590448 -0.614171

1 -0.540213 3.638201 0.504249

1 3.653587 -0.175946 -0.547160

1 3.342149 -1.083708 0.954401

1 3.405055 0.703775 0.984933

5S3O Structure TS IIIa-Vb

6 -0.477321 1.446904 0.185985

7 0.723563 1.453331 -0.310253

7 1.584659 0.384626 -0.019612

6 1.256904 -0.921322 -0.021783

7 0.067434 -1.497995 -0.129520

6 -1.003921 -0.796136 0.222767

6 -0.994707 0.389253 1.116974

6 -1.369131 2.566119 -0.266980

6 3.002018 0.772542 -0.084160

8 2.328045 -1.737221 -0.024999

16 -2.622963 -1.121533 -0.291853

1 -2.691800 -0.022726 0.723741

1 -0.222841 0.251116 1.895431

1 -0.847786 3.263336 -0.927685

1 -1.765206 3.091861 0.608888

1 -2.233354 2.143129 -0.795136

1 3.452794 0.459425 -1.030781

1 3.549896 0.315095 0.741592

1 3.028893 1.857431 -0.001956

1 1.959808 -2.640255 -0.045563

5S3O Structure TS IVa-IVb

6 0.494325 1.672535 -0.035737

7 1.567585 0.962992 -0.112080

7 1.541453 -0.386312 0.313758

6 0.754787 -1.359028 -0.281774

7 -0.542988 -0.971549 -0.688606

6 -1.313665 -0.003799 -0.040178

6 -0.850103 1.214653 0.303322

6 0.645438 3.134271 -0.384132

6 2.893434 -0.821365 0.674779

8 1.108025 -2.515543 -0.431618

16 -3.038949 -0.486863 0.204305

1 -1.045952 -1.798838 -0.987661

1 -1.539335 1.939654 0.721685

1 0.055550 3.391597 -1.272272

1 1.695210 3.367659 -0.571949

1 0.279986 3.761496 0.439377

1 3.544054 -0.887234 -0.205293

1 2.833109 -1.799668 1.150180

1 3.303091 -0.089674 1.372762

1 -3.074384 -0.230350 1.528052

5S3O Structure TS IVb-Va

6 0.496569 1.659140 -0.010691

7 1.600454 1.005606 -0.177559

7 1.649243 -0.379266 0.174094

6 0.730337 -1.275389 -0.178284

7 -0.589966 -1.089446 -0.475067

6 -1.322337 -0.043288 0.024240

6 -0.831629 1.185161 0.355384

6 0.611524 3.140813 -0.291246

6 3.017430 -0.808984 0.450707

8 0.916041 -2.549743 -0.253894

16 -3.076655 -0.323378 0.153917

1 -0.345476 -2.415993 -0.474774

1 -1.528600 1.933316 0.719101

1 -0.033618 3.428495 -1.129884

1 1.644899 3.406214 -0.521339

1 0.279417 3.713361 0.584069

1 3.645123 -0.671648 -0.436164

1 3.006095 -1.859529 0.739769

1 3.413621 -0.197303 1.264675

1 -3.012790 -1.667888 0.072095

5S3O Structure TS Vb-Va

6 -0.379936 1.685883 -0.052077

7 -1.502804 1.058624 -0.067940

6 0.927385 1.132329 0.312703

6 -0.420120 3.125495 -0.505500

7 -1.485936 -0.288969 0.462661

6 -0.749137 -1.182351 -0.291452

6 -2.847752 -0.666681 0.843744

7 0.516711 -1.121051 -0.555678

8 -1.440255 -2.248237 -0.737831

6 1.297933 -0.135433 0.008594

16 3.013419 -0.655378 0.331615

1 1.673796 1.824916 0.688242

1 0.003702 3.774550 0.271459

1 -1.448446 3.432055 -0.706335

1 0.182659 3.269215 -1.410185

1 -2.828116 -1.656785 1.301933

1 -3.534707 -0.671117 -0.011156

1 -3.195726 0.062746 1.577832

1 -0.777206 -2.830746 -1.153487

1 3.565329 -0.028569 -0.730865

3S5O Structure I

6 1.642980 -0.855244 0.021602

7 0.584152 -1.482196 -0.341407

7 -0.658992 -1.009251 0.124555

6 -1.153822 0.244499 -0.106812

7 -0.240623 1.267093 -0.387001

6 1.021845 1.521990 0.147214

6 1.617361 0.357330 0.917585

6 2.960056 -1.342539 -0.507688

6 -1.599909 -2.116616 0.330676

16 -2.790604 0.603458 -0.118880

8 1.575308 2.587924 -0.027367

1 -0.693104 2.099260 -0.752786

1 2.612831 0.644241 1.256619

1 0.979032 0.144737 1.786828

1 3.444858 -0.559020 -1.104123

1 2.817517 -2.228513 -1.129310

1 3.639800 -1.581799 0.319729

1 -2.205088 -2.287261 -0.565380

1 -2.265094 -1.875275 1.160129

1 -1.006379 -3.001127 0.560822

3S5O Structure IIa

6 -1.555797 0.890146 0.188456

7 -0.540237 1.497472 -0.316003

7 0.742204 1.002881 -0.138926

6 1.152074 -0.322264 -0.129807

7 0.253628 -1.299789 -0.511696

6 -0.912227 -1.398846 -0.015523

6 -1.444340 -0.396679 0.984573

6 -2.917285 1.467141 -0.076334

6 1.745938 2.074445 -0.160768

16 2.733218 -0.740686 0.223520

8 -1.728939 -2.364650 -0.486999

1 -2.404017 -0.681258 1.426896

1 -0.709620 -0.274463 1.790692

1 -3.530814 0.768636 -0.661642

1 -2.827402 2.401758 -0.633189

1 -3.450700 1.654917 0.864572

1 2.553261 1.819475 -0.850549

1 2.177543 2.214409 0.834277

1 1.228022 2.979968 -0.477589

1 -2.535595 -2.402864 0.048997

3S5O Structure IIb

6 1.594227 -0.873247 0.156974

7 0.575694 -1.484079 -0.334784

7 -0.713158 -1.011415 -0.101675

6 -1.156117 0.298647 -0.120694

7 -0.267076 1.306558 -0.464047

6 0.899383 1.398946 0.043493

6 1.486659 0.391439 0.988421

6 2.957189 -1.419738 -0.156103

6 -1.693709 -2.104656 -0.092204

16 -2.759977 0.683443 0.165576

8 1.729313 2.391420 -0.317038

1 2.453281 0.713146 1.378019

1 0.789596 0.228838 1.820725

1 3.549499 -0.682953 -0.714540

1 2.872835 -2.331656 -0.750187

1 3.506884 -1.636931 0.768795

1 -2.486408 -1.909490 -0.818390

1 -2.151871 -2.194328 0.896289

1 -1.148471 -3.014934 -0.341067

1 1.245771 2.936066 -0.968325

3S50 Structure IIIa

6 -1.671200 0.808306 0.138214

7 -0.647668 1.459640 -0.294492

7 0.633266 1.000330 0.036551

6 1.025190 -0.310963 -0.063416

7 0.316407 -1.376785 -0.244744

6 -1.028191 -1.504997 0.039184

6 -1.585478 -0.425785 0.988392

6 -3.022888 1.281243 -0.313039

6 1.615435 2.092845 0.005589

16 2.819134 -0.535116 0.012440

8 -1.736534 -2.385806 -0.409537

1 -2.563502 -0.731409 1.361497

1 -0.895931 -0.259651 1.825115

1 -3.519722 0.484000 -0.880987

1 -2.933225 2.168794 -0.942369

1 -3.660405 1.505297 0.551039

1 2.180721 2.100083 -0.932999

1 2.305530 2.004356 0.848829

1 1.055967 3.022120 0.096991

1 2.705454 -1.871472 -0.100624

3S5O Structure IIIb

6 -1.671755 0.784388 0.190961

7 -0.668776 1.452576 -0.266029

7 0.638865 1.019588 -0.011582

6 1.036570 -0.295783 -0.064510

7 0.327858 -1.355194 -0.266075

6 -1.015205 -1.506664 -0.014431

6 -1.565903 -0.475662 0.996432

6 -3.038570 1.264972 -0.206614

6 1.584114 2.138074 -0.136105

16 2.790507 -0.697747 0.063861

8 -1.726673 -2.355233 -0.515574

1 -2.537484 -0.801107 1.369669

1 -0.865330 -0.345897 1.829609

1 -3.549509 0.479560 -0.778664

1 -2.970881 2.167750 -0.816639

1 -3.650133 1.465708 0.681629

1 2.310404 1.960709 -0.934290

1 2.107896 2.319302 0.808803

1 0.986331 3.014726 -0.379391

1 3.272852 0.470330 0.533500

3S5O Structure IVa

6 1.767292 -.746288 -.058689

7 .720427 -1.473633 -.262135

7 -.540643 -1.025768 .241705

6 -1.173038 .104890 -.153200

7 -.348446 1.185676 -.508302

6 .838050 1.503342 .130852

6 1.808957 .613713 .448047

6 3.079149 -1.375585 -.462361

6 -1.338559 -2.182216 .653433

16 -2.832353 .308340 -.233048

8 .913619 2.839975 .338521

1 -.895197 1.992763 -.786541

1 2.721979 .969611 .916125

1 3.552847 -.809143 -1.273110

1 2.920070 -2.405453 -.787378

1 3.775289 -1.371298 .386410

1 -1.834439 -2.645819 -.206771

1 -2.095278 -1.862849 1.369480

1 -.655305 -2.896920 1.113437

1 1.808259 3.064790 .641578

3S5O Structure IVb

6 1.789944 -0.706130 -0.070841

7 0.755901 -1.457115 -0.252279

7 -0.508041 -1.028008 0.266267

6 -1.167180 0.074838 -0.161623

7 -0.354273 1.160187 -0.518844

6 0.818233 1.518268 0.144919

6 1.803850 0.651081 0.451882

6 3.108828 -1.303104 -0.497020

6 -1.273989 -2.193110 0.711158

16 -2.829744 0.241501 -0.273025

8 0.959280 2.846254 0.396305

1 -0.879093 1.906263 -0.958492

1 2.684220 1.027663 0.959159

1 3.560394 -0.714398 -1.304282

1 2.969103 -2.332163 -0.833499

1 3.813892 -1.292215 0.344039

1 -1.737645 -2.707282 -0.138103

1 -2.053442 -1.870318 1.400685

1 -0.577396 -2.866496 1.212000

1 0.088400 3.238386 0.579603

3S5O Structure Va

6 -1.711034 -.827843 -.143041

7 -.607605 -1.500362 -.152008

6 -1.907636 .532939 .310796

6 -2.901613 -1.541716 -.740336

7 .506696 -.881334 .553563

6 1.016345 .250232 -.048463

6 1.410682 -1.937627 .998631

7 .355353 1.343822 -.259471

16 2.741244 .214699 -.548681

6 -.940030 1.484446 .197813

8 -1.257414 2.773205 .467197

1 -2.916423 .865366 .532712

1 -3.726140 -1.556900 -.016410

1 -2.638726 -2.567963 -1.003875

1 -3.264126 -1.019362 -1.633249

1 2.198652 -1.507113 1.620461

1 1.851885 -2.494078 .159727

1 .826135 -2.634194 1.602805

1 2.744301 1.502520 -.942800

1 -.457529 3.293419 .274966

3S5O Structure Vb

6 -1.645231 -0.896680 -0.163852

7 -0.516667 -1.521777 -0.101904

6 -1.914825 0.465882 0.253434

6 -2.780295 -1.673537 -0.789695

7 0.540190 -0.830968 0.617930

6 1.006243 0.301621 -0.040574

6 1.498420 -1.826782 1.090127

7 0.310955 1.362929 -0.264211

16 2.711645 0.289361 -0.604675

6 -0.984181 1.462567 0.183590

8 -1.284390 2.756212 0.462231

1 -2.954570 0.732457 0.434519

1 -3.641687 -1.692279 -0.109701

1 -2.468948 -2.698907 -0.997940

1 -3.112845 -1.201649 -1.721810

1 2.259207 -1.337009 1.701871

1 1.973752 -2.380202 0.267738

1 0.951598 -2.538859 1.711562

1 2.666633 1.565462 -1.033097

1 -2.206485 2.801798 0.762922

3S5O Structure Vc

6 -1.624515 -.904391 -.186088

7 -.489863 -1.521047 -.102125

6 -1.910030 .453901 .228198

6 -2.741395 -1.691338 -.831268

7 .535660 -.805471 .637167

6 1.010769 .312038 -.048230

6 1.453947 -1.769166 1.223842

7 .308722 1.369841 -.260739

16 2.680566 .418389 -.693347

6 -.983371 1.459229 .189648

8 -1.295095 2.744384 .488528

1 -2.955212 .713950 .386375

1 -3.617298 -1.710573 -.170255

1 -2.420273 -2.716356 -1.026274

1 -3.055828 -1.227400 -1.773555

1 2.225294 -1.239837 1.787829

1 1.917861 -2.431305 .476242

1 .881279 -2.394077 1.913338

1 2.999743 -.886300 -.573593

1 -2.217935 2.777698 .788500

3S5O Structure Vd

6 -1.702519 -0.824223 -0.163654

7 -0.597174 -1.497740 -0.166310

6 -1.900241 0.532538 0.297255

6 -2.888028 -1.534976 -0.774253

7 0.499658 -0.869726 0.558161

6 1.023239 0.249276 -0.059849

6 1.355418 -1.907078 1.111755

7 0.361201 1.343543 -0.258271

16 2.725755 0.342970 -0.616739

6 -0.928103 1.484822 0.206062

8 -1.243724 2.769086 0.493911

1 -2.911142 0.866116 0.507876

1 -3.718140 -1.554237 -0.056921

1 -2.623018 -2.559870 -1.041064

1 -3.243548 -1.008117 -1.667221

1 2.152577 -1.448896 1.701255

1 1.783359 -2.564458 0.339275

1 0.739850 -2.523068 1.771313

1 3.000843 -0.976302 -0.574611

1 -0.447460 3.293934 0.297673

3S5O Structure TS I-IIb

6 1.707983 -0.804994 0.004836

7 0.638195 -1.441839 -0.295728

7 -0.613847 -1.012459 0.186588

6 -1.173881 0.232460 -0.074184

7 -0.308696 1.292659 -0.254519

6 0.925486 1.470870 0.192785

6 1.736261 0.435033 0.885094

6 3.006473 -1.310066 -0.555858

6 -1.514818 -2.164061 0.327506

16 -2.822572 0.480162 -0.171047

8 1.270095 2.669093 -0.099057

1 0.036686 2.581246 -0.542668

1 2.748712 0.792288 1.077021

1 1.247969 0.196781 1.841493

1 3.467395 -0.553087 -1.203498

1 2.839824 -2.220155 -1.134904

1 3.719243 -1.517669 0.252625

1 -2.058080 -2.357884 -0.603231

1 -2.238099 -1.957411 1.116158

1 -0.897842 -3.023425 0.590755

3S5O Structure TS I-IIIa

6 1.695075 -0.780053 0.062258

7 0.694553 -1.508179 -0.288009

7 -0.593903 -1.105892 0.104657

6 -1.074554 0.140142 -0.056164

7 -0.395029 1.280170 -0.299279

6 0.903223 1.571552 0.081462

6 1.588535 0.463025 0.901753

6 3.048566 -1.199313 -0.435653

6 -1.513428 -2.247193 0.186509

16 -2.766641 0.579546 -0.078900

8 1.455414 2.621706 -0.178548

1 -1.741252 1.796156 -0.337428

1 2.570307 0.820993 1.213464

1 0.977985 0.250556 1.789966

1 3.485027 -0.400999 -1.049385

1 2.975885 -2.111196 -1.031259

1 3.731288 -1.364759 0.406953

1 -1.906142 -2.498505 -0.804362

1 -2.337838 -1.995771 0.854602

1 -0.956163 -3.094524 0.585664

3S5O Structure TS I-IVa

6 1.745750 -0.777851 -0.012539

7 0.684099 -1.442296 -0.331571

7 -0.604417 -1.007772 0.100870

6 -1.222066 0.175171 -0.098252

7 -0.407119 1.307785 -0.346861

6 0.823869 1.530933 0.127129

6 1.806722 0.570389 0.557982

6 3.051032 -1.454940 -0.343760

6 -1.440489 -2.180169 0.389013

16 -2.877318 0.420912 -0.090217

8 1.364372 2.701239 0.068067

1 2.124997 0.664118 1.597831

1 3.588415 -0.896727 -1.118845

1 2.882944 -2.480272 -0.679839

1 3.695726 -1.465012 0.544588

1 -2.046939 -2.448330 -0.482431

1 -2.106585 -1.956323 1.223047

1 -0.765524 -2.996679 0.641310

1 -0.918670 2.103770 -0.715503

1 2.370901 1.945739 0.214287

3S5O Structure TS IIIa-Vb

6 1.777836 -0.739963 0.073234

7 0.758805 -1.431250 -0.351947

7 -0.571020 -0.993343 -0.057639

6 -1.086917 0.241605 -0.079558

7 -0.490341 1.411237 -0.274430

6 0.789241 1.557867 0.035561

6 1.798830 0.618789 0.571357

6 3.103393 -1.445990 -0.085644

6 -1.452222 -2.163200 0.072199

16 -2.869699 0.332937 0.090862

8 1.431453 2.650950 -0.220002

1 2.385130 1.894472 0.024763

1 2.110904 0.784561 1.603494

1 3.704985 -0.957508 -0.860255

1 2.962650 -2.498526 -0.341607

1 3.669751 -1.371029 0.851011

1 -2.181834 -2.198847 -0.744246

1 -1.977298 -2.145058 1.032216

1 -0.809464 -3.039039 0.021470

1 -2.864343 1.675225 -0.015412

3S5O Structure TS IVa-IVb

6 1.764310 -0.760941 -0.052026

7 0.715186 -1.482767 -0.252390

7 -0.546423 -1.029692 0.240327

6 -1.169837 0.107562 -0.154833

7 -0.344977 1.193262 -0.497678

6 0.857058 1.502169 0.141375

6 1.817463 0.607099 0.443769

6 3.074072 -1.391976 -0.459107

6 -1.355965 -2.185079 0.634775

16 -2.829107 0.315377 -0.236625

8 0.994933 2.830881 0.453352

1 -0.916693 2.006106 -0.697068

1 2.727928 0.973092 0.903461

1 3.555662 -0.816708 -1.258984

1 2.910053 -2.415794 -0.800165

1 3.765811 -1.403051 0.392990

1 -1.851696 -2.634989 -0.232674

1 -2.112801 -1.867756 1.351454

1 -0.680308 -2.909942 1.089849

1 1.219186 3.337325 -0.345208

3S5O Structure TS IVb-Va

6 1.837219 -0.612208 -0.039222

7 0.891381 -1.473498 -0.246041

7 -0.442485 -1.148923 0.196284

6 -1.089540 -0.031354 -0.105589

7 -0.538875 1.189993 -0.352239

6 0.694661 1.567732 0.124685

6 1.758972 0.760823 0.405347

6 3.215511 -1.126140 -0.389656

6 -1.161980 -2.380219 0.514473

16 -2.813608 0.214330 -0.204640

8 0.831833 2.901721 0.282449

1 -1.902352 1.548333 -0.403690

1 2.673924 1.249138 0.720955

1 3.655656 -0.531894 -1.198799

1 3.169079 -2.174134 -0.690909

1 3.877496 -1.030568 0.480111

1 -1.341882 -2.963579 -0.395108

1 -2.109195 -2.136141 0.995891

1 -0.538332 -2.965491 1.193143

1 -0.020542 3.316496 0.066804

3S5O Structure TS Vb-Va

6 -1.623684 -0.923892 -0.167337

7 -0.487619 -1.527375 -0.068866

6 -1.919822 0.445231 0.231555

6 -2.733495 -1.717140 -0.815469

7 0.539010 -0.801614 0.659959

6 0.997472 0.316297 -0.044817

6 1.515749 -1.769387 1.154102

7 0.290154 1.366026 -0.276925

16 2.690811 0.286023 -0.643839

6 -1.010035 1.451230 0.170655

8 -1.409558 2.748074 0.415193

1 -2.957753 0.712295 0.406692

1 -3.608205 -1.747981 -0.153335

1 -2.402724 -2.737418 -1.018886

1 -3.054156 -1.248370 -1.753277

1 2.265713 -1.250687 1.755585

1 2.004045 -2.331388 0.345199

1 0.983155 -2.478581 1.791190

1 2.626857 1.538398 -1.135441

1 -1.381372 2.909476 1.370837

3S5S Structure I

6 -0.893524 1.620816 0.029967

7 0.319566 1.764549 -0.360285

7 1.275743 0.842744 0.112516

6 1.217144 -0.508714 -0.080604

7 -0.039490 -1.098414 -0.298084

6 -1.279793 -0.789430 0.195040

6 -1.325906 0.511216 0.960712

6 -1.925480 2.569574 -0.501452

6 2.589459 1.477350 0.270502

16 2.564035 -1.501842 -0.121085

16 -2.589309 -1.764473 -0.061633

1 0.042737 -2.030981 -0.692659

1 -2.331008 0.672955 1.346164

1 -0.616243 0.460069 1.799763

1 -2.694670 2.017182 -1.056145

1 -1.465342 3.307659 -1.161151

1 -2.433145 3.082713 0.324867

1 3.192191 1.356857 -0.635429

1 3.116752 1.013762 1.104802

1 2.410985 2.533796 0.469244

3S5S Structure IIa

6 -.860923 1.566650 .211087

7 .275275 1.740526 -.367744

7 1.307081 .830594 -.188264

6 1.221383 -.546355 -.090445

7 .010581 -1.159364 -.372731

6 -1.094424 -.809732 .157184

6 -1.171541 .376344 1.096858

6 -1.942404 2.572040 -.062483

6 2.623660 1.468325 -.312883

16 2.556584 -1.495173 .244570

16 -2.558435 -1.669978 -.372607

1 -2.135147 .485708 1.597045

1 -.387340 .262908 1.857622

1 -2.792201 2.097768 -.571518

1 -1.559640 3.375694 -.694435

1 -2.323478 2.996603 .875233

1 3.257658 .890276 -.988627

1 3.117714 1.518618 .661565

1 2.448068 2.472712 -.698532

1 -3.401092 -1.103781 .515495

3S5S Structure IIb

6 -0.866878 1.576322 0.194252

7 0.275250 1.744903 -0.373365

7 1.305018 0.832701 -0.171862

6 1.219567 -0.543356 -0.092943

7 0.006345 -1.158852 -0.376087

6 -1.094791 -0.800188 0.156584

6 -1.189111 0.390948 1.082915

6 -1.944029 2.581693 -0.093981

6 2.623315 1.471714 -0.270840

16 2.556283 -1.497853 0.223094

16 -2.623100 -1.608407 -0.243289

1 -2.168013 0.493376 1.556062

1 -0.424026 0.288915 1.864264

1 -2.795606 2.102157 -0.594530

1 -1.558474 3.376624 -0.735208

1 -2.323751 3.018169 0.838803

1 3.259006 0.917301 -0.965027

1 3.114291 1.485317 0.706147

1 2.450717 2.489343 -0.621170

1 -2.079801 -2.465103 -1.132926

3S5S Structure IIIa

6 -1.078961 1.469973 0.173695

7 0.072121 1.752029 -0.331821

7 1.165853 0.938931 -0.019788

6 1.131023 -0.430217 -0.016990

7 0.108711 -1.227417 -0.101282

6 -1.173788 -0.923705 0.211240

6 -1.329684 0.312011 1.101151

6 -2.247224 2.297541 -0.271563

6 2.435212 1.665389 -0.163409

16 2.754906 -1.208450 0.029076

16 -2.488254 -1.782859 -0.326196

1 -2.325297 0.358644 1.540081

1 -0.571726 0.300411 1.895630

1 -2.981740 1.646203 -0.763714

1 -1.930873 3.077686 -0.966504

1 -2.748606 2.752063 0.591601

1 2.938466 1.410706 -1.102595

1 3.095102 1.441634 0.679181

1 2.192237 2.726371 -0.159054

1 2.219725 -2.443515 0.004791

3S5S Structure IIIb

6 -1.097725 1.442702 0.236070

7 0.032810 1.746906 -0.303599

7 1.162870 0.955384 -0.076130

6 1.147200 -0.415704 -0.004496

7 0.132644 -1.216817 -0.086217

6 -1.159114 -0.945588 0.191146

6 -1.332075 0.256686 1.129024

6 -2.280158 2.279985 -0.154043

6 2.390905 1.715786 -0.350097

16 2.696023 -1.324332 0.093592

16 -2.457995 -1.785740 -0.408238

1 -2.329109 0.277473 1.566940

1 -0.577051 0.220916 1.924784

1 -3.024437 1.640205 -0.646938

1 -1.984296 3.081483 -0.833463

1 -2.760792 2.706922 0.734650

1 2.987141 1.236896 -1.131292

1 2.993278 1.831841 0.557662

1 2.069704 2.699601 -0.687620

1 3.504640 -0.335688 0.525603

3S5S Structure IVa

6 -0.816401 1.804074 -0.082829

7 0.466817 1.837446 -0.195972

7 1.231177 0.744934 0.320229

6 1.164252 -0.516560 -0.179041

7 -0.104734 -0.941197 -0.601261

6 -1.304414 -0.592172 0.016243

6 -1.625218 0.673957 0.360204

6 -1.545379 3.055989 -0.506125

6 2.510600 1.243935 0.827367

16 2.449813 -1.576571 -0.307550

16 -2.358595 -2.011777 0.280068

1 -0.063587 -1.859131 -1.027830

1 -2.573885 0.879041 0.844334

1 -2.199995 2.857716 -1.363268

1 -0.830651 3.837096 -0.772133

1 -2.182456 3.415732 0.312152

1 3.217753 1.424062 0.009910

1 2.936537 0.511191 1.512112

1 2.307805 2.179111 1.350923

1 -3.524463 -1.334869 0.297626

3S5S Structure IVb

6 -.814337 1.804390 -.079687

7 .468147 1.837278 -.192105

7 1.231486 .742997 .323917

6 1.164256 -.515867 -.184521

7 -.104168 -.937207 -.604466

6 -1.298444 -.593474 .029568

6 -1.618234 .671527 .373551

6 -1.548398 3.050052 -.510121

6 2.511039 1.240827 .831905

16 2.450524 -1.576441 -.317309

16 -2.483965 -1.912756 .249880

1 -.069931 -1.848678 -1.043119

1 -2.558875 .865725 .876859

1 -2.207463 2.841054 -1.361217

1 -.837349 3.830464 -.787800

1 -2.182362 3.414773 .308217

1 3.215327 1.430556 .014199

1 2.940773 .502894 1.508584

1 2.307770 2.170568 1.364957

1 -1.616375 -2.826403 .742602

3S5S Structure Va

6 0.645212 1.829168 -0.170482

7 -0.634562 1.749136 -0.022477

6 1.625759 0.799622 0.141860

6 1.153957 3.116290 -0.775457

7 -1.109916 0.564391 0.667373

6 -0.951749 -0.598807 -0.082821

6 -2.417206 0.862780 1.247224

7 0.186766 -1.112911 -0.402624

16 -2.439164 -1.444447 -0.627880

6 1.364839 -0.529780 0.028246

16 2.677654 -1.701906 0.348951

1 2.649810 1.123435 0.306507

1 1.908585 3.566506 -0.117993

1 0.332273 3.821920 -0.911820

1 1.635750 2.932008 -1.742910

1 -2.759770 0.003535 1.827880

1 -3.166644 1.129442 0.488455

1 -2.291648 1.713789 1.919675

1 -1.759146 -2.470360 -1.174656

1 2.014048 -2.758573 -0.159606

3S5S Structure Vb

6 0.646075 1.826383 -0.167007

7 -0.634621 1.750343 -0.029965

6 1.624245 0.797586 0.161890

6 1.163280 3.108455 -0.775961

7 -1.119393 0.570871 0.661535

6 -0.955393 -0.597783 -0.079847

6 -2.431535 0.875244 1.227313

7 0.184392 -1.110547 -0.392153

16 -2.437204 -1.452782 -0.621282

6 1.363139 -0.531679 0.038886

16 2.588437 -1.807612 0.282222

1 2.644246 1.128980 0.334251

1 1.916376 3.559771 -0.117362

1 0.344914 3.816394 -0.920077

1 1.648576 2.917405 -1.740402

1 -2.779141 0.021588 1.813076

1 -3.174555 1.134638 0.459791

1 -2.311344 1.732688 1.892569

1 -1.750748 -2.485596 -1.146621

1 3.570450 -1.003468 0.742155

3S5S Structure Vc

6 0.620316 1.825172 -0.183875

7 -0.659767 1.735931 -0.029248

6 1.610777 0.808293 0.138451

6 1.115477 3.110552 -0.803659

7 -1.106198 0.548205 0.673215

6 -0.954871 -0.610799 -0.090578

6 -2.362682 0.839429 1.347458

7 0.190157 -1.112517 -0.397417

16 -2.346070 -1.557222 -0.707011

6 1.361425 -0.527247 0.034681

16 2.600073 -1.786910 0.289318

1 2.630613 1.150190 0.290286

1 1.876973 3.568724 -0.159772

1 0.289012 3.811877 -0.933484

1 1.584206 2.922186 -1.776718

1 -2.702354 -0.050778 1.881409

1 -3.147256 1.192403 0.660349

1 -2.172351 1.632865 2.074075

1 -3.299056 -0.627031 -0.494845

1 3.564160 -0.968061 0.761085

3S5S Structure Vd

6 .629050 1.827635 -.185134

7 -.651312 1.740400 -.028191

6 1.615761 .805394 .125878

6 1.125454 3.115647 -.798003

7 -1.099242 .550549 .671016

6 -.954298 -.606313 -.094403

6 -2.351115 .843909 1.352736

7 .188737 -1.112828 -.406973

16 -2.350921 -1.549414 -.706583

6 1.360889 -.528570 .026056

16 2.676948 -1.692430 .355118

1 2.640408 1.134784 .274847

1 1.886472 3.569246 -.150477

1 .299839 3.818398 -.925421

1 1.596010 2.931651 -1.770952

1 -2.691454 -.046626 1.885702

1 -3.137713 1.201975 .670606

1 -2.154127 1.634372 2.080737

1 -3.300356 -.615768 -.494093

1 2.022763 -2.751581 -.161241

3S5S Structure TS I-IIb

6 -0.960883 1.645624 0.056460

7 0.245234 1.775240 -0.357585

7 1.234934 0.880140 0.077348

6 1.189686 -0.497640 -0.053454

7 -0.047268 -1.111962 -0.204555

6 -1.216421 -0.733629 0.274964

6 -1.394154 0.549734 1.016020

6 -1.993674 2.603517 -0.460631

6 2.548599 1.536364 0.114818

16 2.564119 -1.448280 -0.063916

16 -2.371751 -1.929891 -0.156001

1 -2.418316 0.688376 1.362226

1 -0.715846 0.552540 1.881988

1 -2.770008 2.064411 -1.018768

1 -1.531288 3.342753 -1.117316

1 -2.492868 3.115694 0.371737

1 3.117289 1.326000 -0.796893

1 3.115443 1.162535 0.968301

1 2.367251 2.606392 0.213122

1 -0.818763 -2.235696 -0.641249

3S5S Structure TS I-IIIa

6 -0.936311 1.614661 0.077016

7 0.269502 1.838401 -0.308880

7 1.273037 0.935483 0.080484

6 1.165924 -0.399690 -0.028357

7 0.046041 -1.145041 -0.202006

6 -1.222721 -0.838552 0.173841

6 -1.344156 0.464473 0.963228

6 -2.001464 2.543473 -0.426161

6 2.598804 1.565802 0.099666

16 2.489863 -1.533015 -0.075529

16 -2.526779 -1.804247 -0.155608

1 -2.365678 0.588343 1.319954

1 -0.663868 0.419695 1.826066

1 -2.746244 1.973987 -0.996903

1 -1.572461 3.318881 -1.063520

1 -2.530556 3.009253 0.414305

1 3.054469 1.536121 -0.895767

1 3.236827 1.038217 0.809833

1 2.466813 2.600896 0.413309

1 1.030844 -2.192124 -0.271658

3S5S Structure TS I-IVa

6 -1.089485 1.423802 0.122226

7 0.078519 1.690140 -0.365207

7 1.188902 0.903144 0.011694

6 1.328557 -0.450243 -0.035530

7 0.160397 -1.244505 -0.132014

6 -1.068188 -0.879789 0.254612

6 -1.307055 0.290296 1.092047

6 -2.227363 2.275998 -0.353271

6 2.409866 1.717246 0.068257

16 2.798317 -1.255866 -0.069634

16 -2.533870 -1.651103 -0.210553

1 0.356280 -2.175325 -0.491177

1 -2.876211 -0.573202 0.771804

1 -0.504579 0.375276 1.844169

1 -2.972455 1.648439 -0.858532

1 -1.886892 3.055505 -1.038917

1 -2.729922 2.723804 0.511737

1 3.012218 1.575398 -0.834470

1 3.006228 1.421208 0.933022

1 2.091468 2.755085 0.154000

3S5S Structure TS IIIa-Vb

6 -1.150175 1.362344 0.192961

7 -0.003907 1.707630 -0.317363

7 1.129611 0.931323 -0.036641

6 1.192451 -0.419160 -0.034121

7 0.195123 -1.284657 -0.144946

6 -1.024444 -0.913982 0.221341

6 -1.339161 0.214664 1.138897

6 -2.327420 2.170211 -0.269712

6 2.357096 1.738866 -0.077450

16 2.840563 -1.117982 -0.007357

16 -2.496273 -1.667652 -0.290375

1 -2.853015 -0.652390 0.753888

1 -0.545056 0.296304 1.901902

1 -3.035589 1.504432 -0.779657

1 -2.032689 2.973085 -0.949902

1 -2.852952 2.577771 0.600777

1 2.942290 1.524243 -0.978127

1 2.965084 1.545502 0.811123

1 2.043034 2.780626 -0.088002

1 2.364380 -2.377166 -0.047148

3S5S Structure TS IVa-IVb

6 -0.744866 1.832011 -0.076133

7 0.537691 1.821530 -0.180189

7 1.265331 0.702058 0.322809

6 1.151076 -0.558176 -0.182281

7 -0.129095 -0.951492 -0.597206

6 -1.321773 -0.552156 0.011738

6 -1.599511 0.723099 0.347660

6 -1.433768 3.105142 -0.501755

6 2.571178 1.155015 0.808869

16 2.406618 -1.653805 -0.310362

16 -2.502206 -1.875625 0.356221

1 -0.113466 -1.910546 -0.922154

1 -2.555102 0.951703 0.804707

1 -2.095609 2.926346 -1.357719

1 -0.693997 3.861215 -0.771334

1 -2.058234 3.487270 0.315962

1 3.275797 1.296299 -0.018203

1 2.974709 0.413989 1.498084

1 2.411558 2.103367 1.323376

1 -3.067764 -1.893046 -0.872946

3S5S Structure TS IVb-Va

6 -0.757196 1.833989 -0.065773

7 0.525476 1.887801 -0.192607

7 1.306925 0.781158 0.306495

6 1.110950 -0.477154 -0.095733

7 -0.078340 -1.066493 -0.373214

6 -1.286494 -0.581622 0.069376

6 -1.589724 0.715521 0.356134

6 -1.482762 3.091727 -0.484815

6 2.644723 1.251276 0.660461

16 2.306590 -1.727980 -0.302951

16 -2.582634 -1.799737 0.194888

1 0.777068 -2.192876 -0.550261

1 -2.594098 0.949260 0.695183

1 -2.148158 2.891614 -1.332758

1 -0.769730 3.871334 -0.758677

1 -2.109249 3.450775 0.341495

1 3.202480 1.550237 -0.234362

1 3.178917 0.459059 1.185781

1 2.531543 2.117444 1.315257

1 -1.767484 -2.873048 0.244727

3S5S Structure TS Vb-Va

6 0.567450 1.833563 -0.167627

7 -0.706216 1.716177 -0.015027

6 1.573646 0.829445 0.183629

6 1.048227 3.116613 -0.801135

7 -1.134749 0.522186 0.687962

6 -0.946877 -0.629465 -0.083737

6 -2.450929 0.776314 1.270087

7 0.206221 -1.108669 -0.402892

16 -2.409092 -1.496100 -0.655107

6 1.365526 -0.502709 0.040884

16 2.719964 -1.667538 0.376248

1 2.571974 1.185831 0.419402

1 1.787921 3.601669 -0.151514

1 0.210205 3.797794 -0.960438

1 1.540018 2.920782 -1.761447

1 -2.763565 -0.097682 1.845401

1 -3.209860 1.021919 0.513725

1 -2.353333 1.626558 1.948382

1 -1.699404 -2.500783 -1.203831

1 3.443038 -1.388292 -0.730840
